# Supplementary material
Source: PubMed Central journal article supplement (PMC8782155)
Supplement: NIHMS1770141-supplement-1.pdf [file NIHMS1770141-supplement-1.pdf]

**Supplementary Table 1.**

| Species  | Category                   | Number | Origin, status and comment                                                                                                                                                                                                                             |
|----------|----------------------------|--------|--------------------------------------------------------------------------------------------------------------------------------------------------------------------------------------------------------------------------------------------------------|
| Equine   | Routine and export testing | 469    | Presumed largely Australian origin; infection-negative (by ELISA and VN serology).                                                                                                                                                                     |
|          | Field infection            | 16     | Australian origin, infection positive (antibody and agent detection. Fifteen field samples from Colling et al., 2018: 1-4, 10(b), 12(b), 14(b), 16(b), 18(b), 20(b), 22(b), 25(c), 26(d), 28(b), 30(b) and one diagnostic submission from NSW in 2013. |
|          | Vaccination                | 56     | Presumed largely Australian origin, documented vaccination history and serology.                                                                                                                                                                       |
| Canine   | Routine and export testing | 312    | Australian and other country of origin; infection-negative (low probability of exposure and/or serology).                                                                                                                                              |
|          | Experimental infection     | 5      | Reference – Middleton et al.2017                                                                                                                                                                                                                       |
| Feline   | Routine and export testing | 112    | Australian and other country of origin; infection-negative (low probability of exposure and/or serology).                                                                                                                                              |
| Pteropid | Field (Australian)         | 19     | Geelong Botanic Garden, Victoria, Australia.                                                                                                                                                                                                           |
|          |                            | 81     | Various from New South Wales, Australia                                                                                                                                                                                                                |
|          | Field (off-shore)          | 21     | Diagnostic submissions sourced from the Laboratory of Veterinary, Food and Phytopathology, New Caledonia Likely exposure status inferred from history and/or serology. (Note – HeV does not occur in Geelong bats).                                    |

---

Serum panels used in diagnostic evaluation of the HeV bELISAs

**Supplementary Table 2.**

Numbers of positive and negative animals tested, and individual and multiple species cut off values with respective estimates for Se and Sp.

|                        | Cutoff<br>(by species) |                 | Number of<br>positives<br>(by species) |                 | Number of<br>negatives<br>(by species) |                 | Se<br>(by species) |                 | Sp<br>(by species) |                 | Cutoff<br>(dog, horse, cat<br>together) |              | Se<br>(dog, horse, cat<br>together) |                 | Sp<br>(dog, horse, cat<br>together) |                 |
|------------------------|------------------------|-----------------|----------------------------------------|-----------------|----------------------------------------|-----------------|--------------------|-----------------|--------------------|-----------------|-----------------------------------------|--------------|-------------------------------------|-----------------|-------------------------------------|-----------------|
|                        | mAb<br>1.2             | mAb<br>102.4    | mAb<br>1.2                             | mAb<br>102.4    | mAb<br>1.2                             | mAb<br>102.4    | mAb<br>1.2         | mAb<br>102.4    | mAb<br>1.2         | mAb<br>102.4    | mAb<br>1.2                              | mAb<br>102.4 | mAb<br>1.2                          | mAb<br>102.4    | mAb<br>1.2                          | mAb<br>102.4    |
| Dogs                   | 49                     | 38              | 5/5                                    | 5/5             | 312/312                                | 312/312         | 100                | 100             | 100                | 100             | 33                                      | 49           | 100                                 | 100             | 98.72<br>308/312                    | 100             |
| Cats                   | 41 <sup>1</sup>        | 38 <sup>1</sup> | 0                                      | 0               | 150/151                                | 151             | ND <sup>3</sup>    | ND <sup>3</sup> | 99.3<br>(147/151)  | 97<br>(147/151) | 33                                      | 49           | ND <sup>3</sup>                     | ND <sup>3</sup> | 99.3                                | 98<br>(149/151) |
| Horses<br>infected     | 33                     | 38              | 16/16                                  | 16/16           | 469/469                                | 469/469         | 100                | 100             | 100                | 100             | 33                                      | 49           | 100                                 | 100             | 100                                 | 100             |
| Horses<br>vaccinated   | 33                     | 38              | 56/56                                  | 56/56           | 469/469                                | 469/469         | 100                | 100             | 100                | 100             | 33                                      | 49           | 100                                 | 100             | 100                                 | 100             |
| Dogs<br>Horses<br>Cats | NA <sup>2</sup>        | NA <sup>2</sup> | 77/77                                  | 77/77           | 927/932                                | 930/932         | 100                | 100             | 99.5<br>(927/932)  | 99.8<br>930/932 | 33                                      | 49           | 100                                 | 100             | 99.5                                | 99.8            |
| Bats                   | 27*                    | ND <sup>3</sup> | 0                                      | ND <sup>3</sup> | 19/19                                  | ND <sup>3</sup> | ND <sup>3</sup>    | ND <sup>3</sup> | 100                | ND <sup>3</sup> | 33                                      | 49           | NA <sup>2</sup>                     | NA <sup>2</sup> | 100                                 | ND <sup>3</sup> |

<sup>1</sup>Average of negative population plus 3 standard deviations

<sup>2</sup>Not available

<sup>3</sup>No data
